# Supplementary material
Source: MDPI journal article supplement (https://www.mdpi.com/2073-4433/13/8/1165)
Supplement: s1 [file s1]

Archive with 3 entries (3 files):
- atmosphere-1640523-Figure S1.pdf
- atmosphere-1640523-Tables S1-S6.pdf
- Institutional Review Board Statement.pdf
