# Supplementary material
Source: MDPI journal article supplement (https://www.mdpi.com/2073-4433/13/8/1165)

## Institutional Review Board Statement

We hereby declare that the paper “Leisure Path Design along Songhua River in Harbin, China, Considering the Influence of Outdoor Thermal Comfort, Physical Fitness and Emotional Valence” submitted to the journal Atmosphere was granted by the Jiangho Architecture College.

This study was about people’s responses to the outdoor environment between a sunshine pathway and a tree-shaded pathway along the Songhua River, by the method of a questionnaire survey on the subjects’ local-thermal sensation, overall thermal comfort, physical fitness, emotional valence, etc., and filed measurement of skin temperatures.

The questionnaire survey was completely anonymous research, and all respondents were voluntary. People knew the use of the study when they took part in the survey and experiment. No causing any harm to the human body during the experiment and no personal information would be leaked. The data collected in this study would be only used in scientific research , and the use of commercial or any other purpose for the data is forbidden.

Vice dean of Jiangho Architecture College, Northeastern University

Jiangho Architecture College, Northeastern University

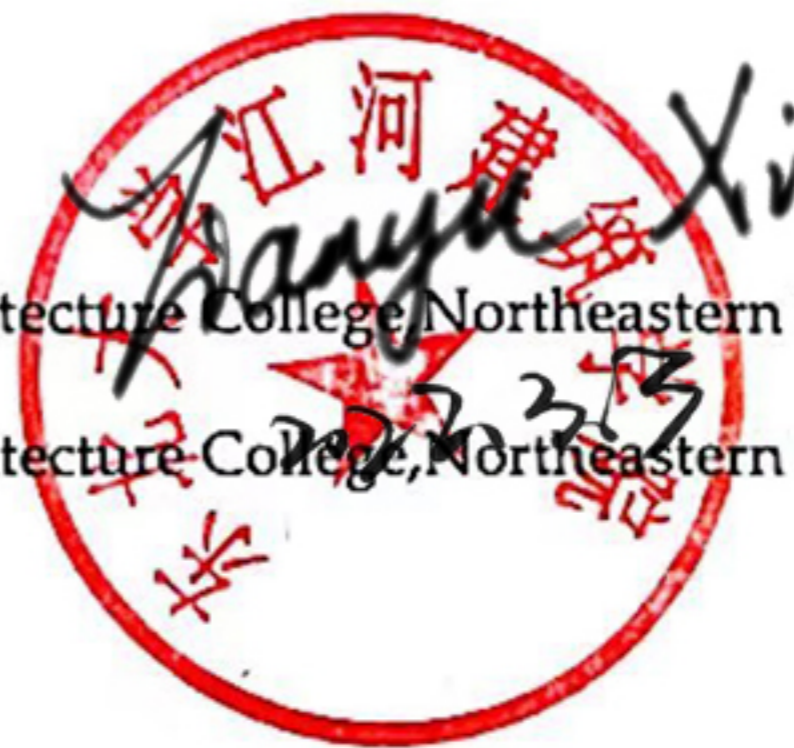

Supplement: s1 [file s1]
