# Supplementary material
Source: MDPI journal article supplement (https://www.mdpi.com/2073-4433/13/8/1165)
Supplement: s1 [file s1]

# Supplementary Materials:

Tianyu Xi <sup>1,\*</sup>, Xinyue Zhang <sup>1</sup>, Wenxin Jin <sup>1</sup>, Weiqing Xu <sup>1</sup>, Yu Wu <sup>1</sup> and Huan Qin <sup>2,3</sup>

Supplementary Section Figure S1: Core temperature and local- skin temperature

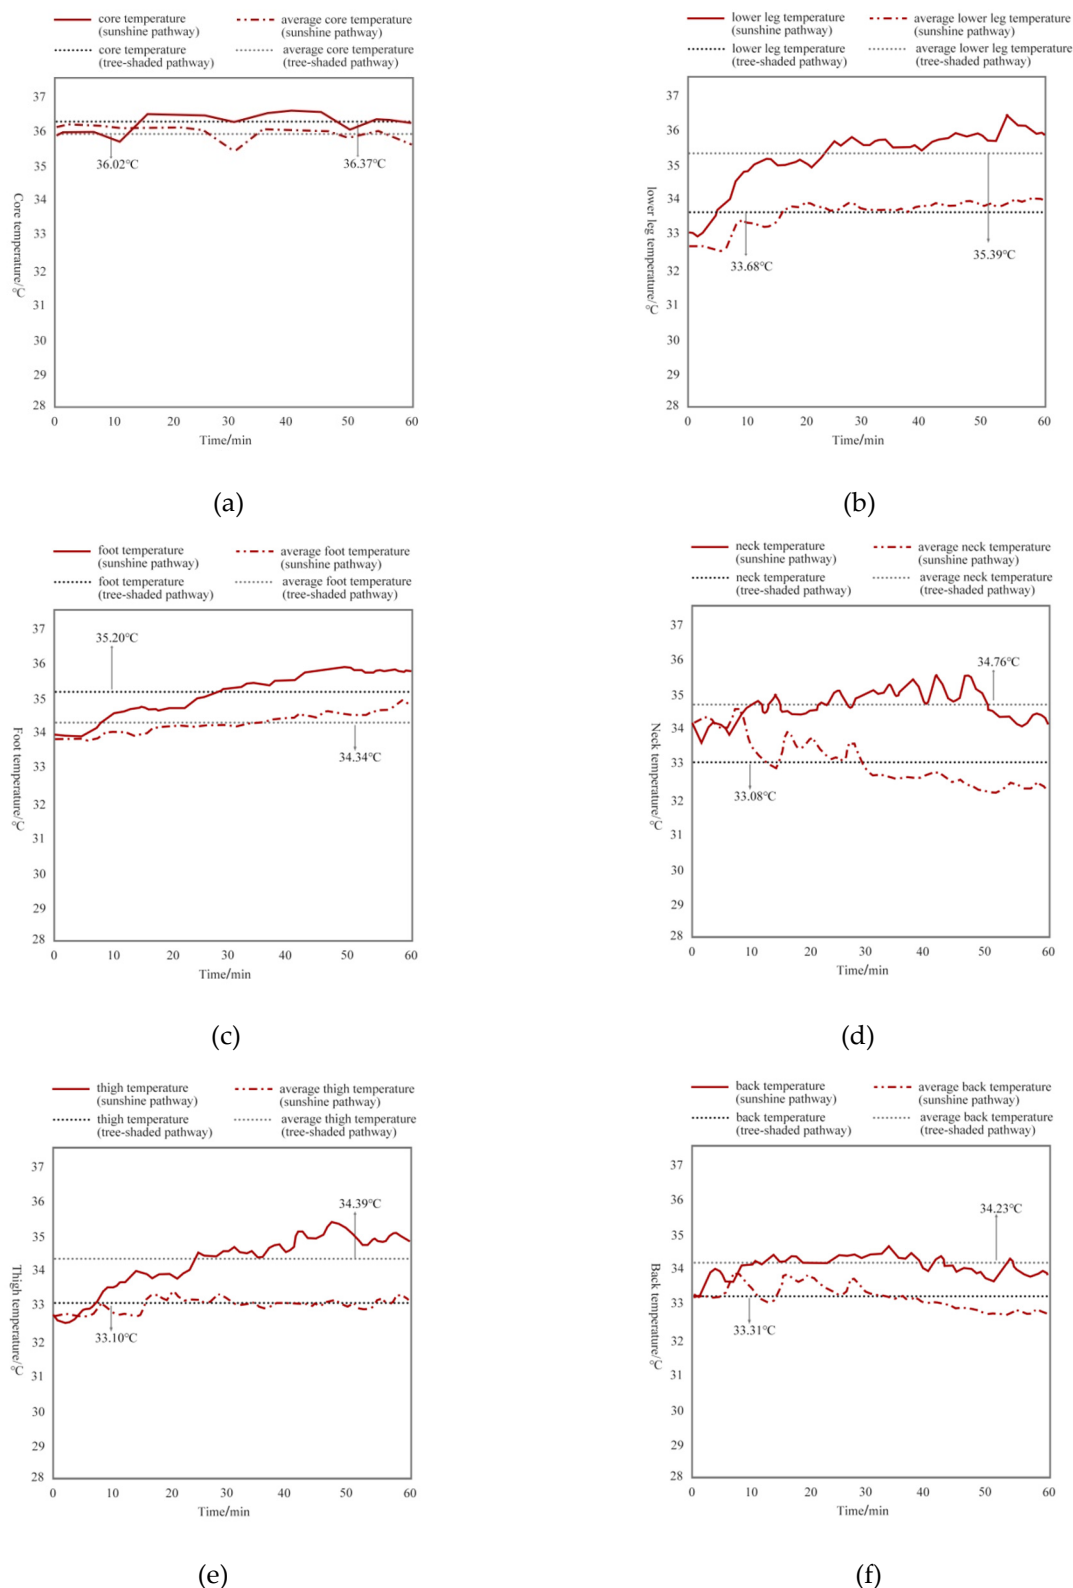

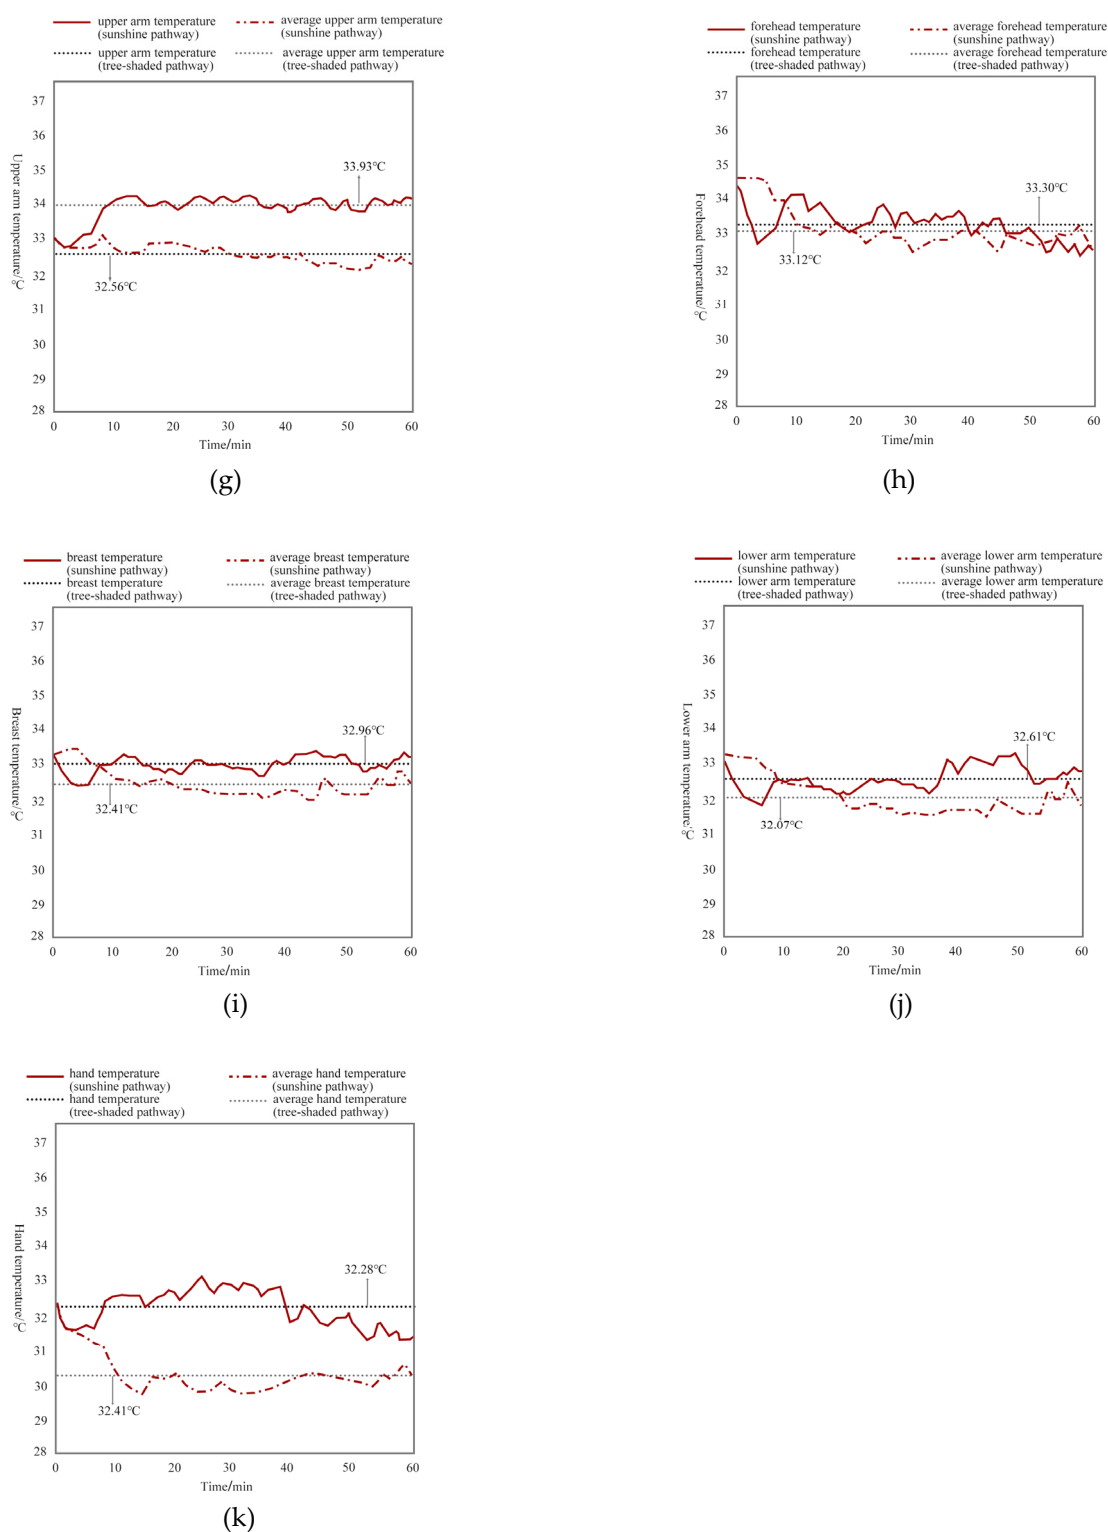

Figure S1 showed how the core temperature and local skin temperature of each part of the subjects' body changed with time: (a) Curve of core temperature; (b) Curve of lower leg temperature; (c) Curve of foot temperature; (d) Curve of neck temperature; (e) Curve of thigh temperature; (f) Curve of back temperature; (g) Curve of upper arm temperature; (h) Curve of forehead temperature; (i) Curve of breast temperature; (j) Curve of lower arm temperature; (k) Curve of hand temperature.
