# Supplementary material
Source: MDPI journal article supplement (https://www.mdpi.com/2073-4433/13/8/1165)
Supplement: s1 [file s1]

# Supplementary Materials:

Tianyu Xi<sup>1,\*</sup>, Xinyue Zhang<sup>1</sup>, Wenxin Jin<sup>1</sup>, Weiqing Xu<sup>1</sup>, Yu Wu<sup>1</sup> and Huan Qin<sup>2,3</sup>

Supplementary Section:

Statistical test results on thermal comfort and thermal sensation

**Table S1. Results of paired-sample T test on thermal sensation.**

| Paired Samples Statistics And Test |                |                 |    |                     |                           |             |                     |                       |                                                        |             |               |    |                     |
|------------------------------------|----------------|-----------------|----|---------------------|---------------------------|-------------|---------------------|-----------------------|--------------------------------------------------------|-------------|---------------|----|---------------------|
| Paired Differences                 |                |                 |    |                     |                           |             |                     |                       |                                                        |             |               |    |                     |
|                                    |                | Mea<br>n        | N  | Std. De-<br>viation | Std.<br>Error<br>Mea<br>n | Mea<br>n    | Std. De-<br>viation | Std.<br>Error<br>Mean | 95% Confi-<br>dence Inter-<br>val of the<br>Difference |             | t             | df | Sig. (2-<br>tailed) |
|                                    |                |                 |    |                     |                           |             |                     |                       | Low<br>er                                              | Up-<br>per  |               |    |                     |
| Pair<br>1                          | TSV<br>(r<br>) | 1.166<br>7      | 12 | 0.62668             | 0.180<br>91               | 1.498<br>33 | 0.62717             | 0.18105               | 1.099<br>85                                            | 1.896<br>82 | 8.<br>27<br>6 | 11 | 0.000               |
|                                    | TSV<br>(s<br>) | -<br>0.331<br>7 | 12 | 0.28463             | 0.082<br>17               |             |                     |                       |                                                        |             |               |    |                     |

As shown in Table S1,  $t=8.276$ ,  $P(\text{Sig. (2-tailed)})=0.000 < 0.05$ , which shows that the difference is statistically significant.

**Table S2. Results of paired-sample T test on thermal comfort.**

| Paired Samples Statistics And Test |            |             |    |                   |                           |                    |                   |                       |                                                       |          |        |    |                     |
|------------------------------------|------------|-------------|----|-------------------|---------------------------|--------------------|-------------------|-----------------------|-------------------------------------------------------|----------|--------|----|---------------------|
|                                    |            | Mea<br>n    | N  | Std.<br>Deviation | Std.<br>Error<br>Mea<br>n | Paired Differences |                   |                       |                                                       |          | t      | df | Sig. (2-<br>tailed) |
|                                    |            |             |    |                   |                           | Mea<br>n           | Std.<br>Deviation | Std.<br>Error<br>Mean | 95%<br>Confidence<br>Interval of<br>the<br>Difference |          |        |    |                     |
|                                    |            |             |    |                   |                           |                    |                   |                       | Lower                                                 | Upper    |        |    |                     |
|                                    |            |             |    |                   |                           |                    |                   |                       |                                                       |          |        |    |                     |
| Pair<br>1                          | TCV<br>(r) | -<br>0.4717 | 12 | 0.77234           | 0.22295                   | 1.13833            | 0.50187           | 0.14488               | -1.45720                                              | -0.81946 | -7.857 | 11 | 0.000               |
|                                    | TCV<br>(s) | 0.6667      | 12 | 0.40178           | 0.11598                   |                    |                   |                       | 1.45720                                               | 0.81946  |        |    |                     |

As shown in Table S2,  $t=8.276$ ,  $P(\text{Sig. (2-tailed)})=0.000 < 0.05$ , which shows that the difference is statistically significant.

**Table S3. The results of unary linear regression on TSV(r).**

| Variables Entered/Removed <sup>a</sup> |                   |                   |                   |                            |        |                   |
|----------------------------------------|-------------------|-------------------|-------------------|----------------------------|--------|-------------------|
| Model                                  | Variables Entered | Variables Removed |                   |                            | Method |                   |
| 1                                      | Time <sup>b</sup> |                   |                   |                            | Enter  |                   |
| a. Dependent Variable: TSV ( r )       |                   |                   |                   |                            |        |                   |
| b. All requested variables entered.    |                   |                   |                   |                            |        |                   |
| Model Summary                          |                   |                   |                   |                            |        |                   |
| Model                                  | R                 | R Square          | Adjusted R Square | Std. Error of the Estimate |        |                   |
| 1                                      | .790 <sup>a</sup> | 0.624             | 0.586             | 0.40316                    |        |                   |
| a. Predictors: (Constant), Time        |                   |                   |                   |                            |        |                   |
| ANOVA <sup>a</sup>                     |                   |                   |                   |                            |        |                   |
| Model                                  |                   | Sum of Squares    | df                | Mean Square                | F      | Sig.              |
| 1                                      | Regression        | 2.695             | 1                 | 2.695                      | 16.578 | .002 <sup>b</sup> |
|                                        | Residual          | 1.625             | 10                | 0.163                      |        |                   |
|                                        | Total             | 4.320             | 11                |                            |        |                   |
| a. Dependent Variable: TSV ( r )       |                   |                   |                   |                            |        |                   |
| b. Predictors: (Constant), Time        |                   |                   |                   |                            |        |                   |
| Coefficients <sup>a</sup>              |                   |                   |                   |                            |        |                   |
| Model                                  |                   | Unstandardized    |                   | Standardized               | t      | Sig.              |
|                                        |                   | Coefficients      |                   | Coefficients               |        |                   |
|                                        |                   | B                 | Std. Error        | Beta                       |        |                   |
| 1                                      | (Constant)        | 0.274             | 0.248             |                            | 1.106  | 0.295             |
|                                        | Time              | 0.027             | 0.007             | 0.790                      | 4.072  | 0.002             |

As shown in Table S3.( ANOVA<sup>a</sup>),  $P(\text{Sig.})=0.002 < 0.05$ , which shows that the regression model is statistically significant.

As shown in Table S3.( Coefficients<sup>a</sup>),  $P(\text{Sig.})=0.002 < 0.05$ , which shows that the slope is statistically significant.

Table S4. The results of unary linear regression on TSV(s).

| Variables Entered/Removed <sup>a</sup> |                   |                             |                   |                            |        |                   |
|----------------------------------------|-------------------|-----------------------------|-------------------|----------------------------|--------|-------------------|
| Model                                  | Variables Entered | Variables Removed           | Method            |                            |        |                   |
| 1                                      | Time <sup>b</sup> |                             | Enter             |                            |        |                   |
| a. Dependent Variable: TSV（s）          |                   |                             |                   |                            |        |                   |
| b. All requested variables entered.    |                   |                             |                   |                            |        |                   |
| Model Summary                          |                   |                             |                   |                            |        |                   |
| Model                                  | R                 | R Square                    | Adjusted R Square | Std. Error of the Estimate |        |                   |
| 1                                      | .092 <sup>a</sup> | 0.008                       | -0.091            | 0.29725                    |        |                   |
| a. Predictors: (Constant), Time        |                   |                             |                   |                            |        |                   |
| ANOVA <sup>a</sup>                     |                   |                             |                   |                            |        |                   |
|                                        | Model             | Sum of Squares              | df                | Mean Square                | F      | Sig.              |
| 1                                      | Regression        | 0.008                       | 1                 | 0.008                      | 0.086  | .776 <sup>b</sup> |
|                                        | Residual          | 0.884                       | 10                | 0.088                      |        |                   |
|                                        | Total             | 0.891                       | 11                |                            |        |                   |
| a. Dependent Variable: TSV（s）          |                   |                             |                   |                            |        |                   |
| b. Predictors: (Constant), Time        |                   |                             |                   |                            |        |                   |
| Coefficients <sup>a</sup>              |                   |                             |                   |                            |        |                   |
|                                        | Model             | Unstandardized Coefficients |                   | Standardized Coefficients  | t      | Sig.              |
|                                        |                   | B                           | Std. Error        | Beta                       |        |                   |
| 1                                      | (Constant)        | -0.284                      | 0.183             |                            | -1.555 | 0.151             |
|                                        | Time              | -0.001                      | 0.005             | -0.092                     | -0.293 | 0.776             |
| a. Dependent Variable: TSV（s）          |                   |                             |                   |                            |        |                   |

As shown in Table S4.( ANOVA<sup>a</sup>),  $P(\text{Sig.})=0.776 > 0.05$ , which shows that the regression model is not statistically significant.

As shown in Table S4.( Coefficients<sup>a</sup>),  $P(\text{Sig.})=0.776 > 0.05$ , which shows that the slope is not statistically significant.

Table S5. The results of unary linear regression on TCV(r).

| Variables Entered/Removed <sup>a</sup> |                   |                             |                   |                            |        |                   |
|----------------------------------------|-------------------|-----------------------------|-------------------|----------------------------|--------|-------------------|
| Model                                  | Variables Entered | Variables Removed           | Method            |                            |        |                   |
| 1                                      | Time <sup>b</sup> |                             | Enter             |                            |        |                   |
| a. Dependent Variable: TCV ( r )       |                   |                             |                   |                            |        |                   |
| b. All requested variables entered.    |                   |                             |                   |                            |        |                   |
| Model Summary                          |                   |                             |                   |                            |        |                   |
| Model                                  | R                 | R Square                    | Adjusted R Square | Std. Error of the Estimate |        |                   |
| 1                                      | .779 <sup>a</sup> | 0.607                       | 0.567             | 0.50798                    |        |                   |
| a. Predictors: (Constant), Time        |                   |                             |                   |                            |        |                   |
| ANOVA <sup>a</sup>                     |                   |                             |                   |                            |        |                   |
|                                        | Model             | Sum of Squares              | df                | Mean Square                | F      | Sig.              |
| 1                                      | Regression        | 3.981                       | 1                 | 3.981                      | 15.428 | .003 <sup>b</sup> |
|                                        | Residual          | 2.580                       | 10                | 0.258                      |        |                   |
|                                        | Total             | 6.562                       | 11                |                            |        |                   |
| a. Dependent Variable: TCV ( r )       |                   |                             |                   |                            |        |                   |
| b. Predictors: (Constant), Time        |                   |                             |                   |                            |        |                   |
| Coefficients <sup>a</sup>              |                   |                             |                   |                            |        |                   |
|                                        | Model             | Unstandardized Coefficients |                   | Standardized Coefficients  | t      | Sig.              |
|                                        |                   | B                           | Std. Error        | Beta                       |        |                   |
| 1                                      | (Constant)        | 0.613                       | 0.313             |                            | 1.960  | 0.078             |
|                                        | Time              | -0.033                      | 0.008             | -0.779                     | -3.928 | 0.003             |
| a. Dependent Variable: TCV ( r )       |                   |                             |                   |                            |        |                   |

As shown in Table S5. (ANOVA<sup>a</sup>),  $P(\text{Sig.}) = 0.003 < 0.05$ , which shows that the regression model is statistically significant.

As shown in Table S5. (Coefficients<sup>a</sup>),  $P(\text{Sig.}) = 0.003 < 0.05$ , which shows that the slope is statistically significant.

Table S6. The results of unary linear regression on TCV(s).

| Variables Entered/Removed <sup>a</sup> |                             |                   |                           |                            |        |                   |
|----------------------------------------|-----------------------------|-------------------|---------------------------|----------------------------|--------|-------------------|
| Model                                  | Variables Entered           | Variables Removed | Method                    |                            |        |                   |
| 1                                      | Time <sup>b</sup>           |                   | Enter                     |                            |        |                   |
| a. Dependent Variable: TCV ( s )       |                             |                   |                           |                            |        |                   |
| b. All requested variables entered.    |                             |                   |                           |                            |        |                   |
| Model Summary                          |                             |                   |                           |                            |        |                   |
| Model                                  | R                           | R Square          | Adjusted R Square         | Std. Error of the Estimate |        |                   |
| 1                                      | .626 <sup>a</sup>           | 0.391             | 0.331                     | 0.32872                    |        |                   |
| a. Predictors: (Constant), Time        |                             |                   |                           |                            |        |                   |
| ANOVA <sup>a</sup>                     |                             |                   |                           |                            |        |                   |
| Model                                  | Sum of Squares              | df                | Mean Square               | F                          | Sig.   |                   |
| 1                                      | Regression                  | 0.695             | 1                         | 0.695                      | 6.433  | .030 <sup>b</sup> |
|                                        | Residual                    | 1.081             | 10                        | 0.108                      |        |                   |
|                                        | Total                       | 1.776             | 11                        |                            |        |                   |
| a. Dependent Variable: TCV ( s )       |                             |                   |                           |                            |        |                   |
| b. Predictors: (Constant), Time        |                             |                   |                           |                            |        |                   |
| Coefficients <sup>a</sup>              |                             |                   |                           |                            |        |                   |
| Model                                  | Unstandardized Coefficients |                   | Standardized Coefficients | t                          | Sig.   |                   |
|                                        | B                           | Std. Error        | Beta                      |                            |        |                   |
| 1                                      | (Constant)                  | 1.120             | 0.202                     |                            | 5.535  | 0.000             |
|                                        | Time                        | -0.014            | 0.005                     | -0.626                     | -2.536 | 0.030             |
| a. Dependent Variable: TCV ( s )       |                             |                   |                           |                            |        |                   |

As shown in Table S6. (ANOVA<sup>a</sup>),  $P(\text{Sig.}) = 0.030 < 0.05$ , which shows that the regression model is statistically significant.

As shown in Table S6. (Coefficients<sup>a</sup>),  $P(\text{Sig.}) = 0.030 < 0.05$ , which shows that the slope is statistically significant.

Table S1 show the results of paired-sample T test on thermal sensation: Paired Samples Statistics and Paired Samples Test.

Table S2 show the results of paired-sample T test on thermal comfort: Paired Samples Statistics and Paired Samples Test.

Table S3 show the results of unary linear regression on TSV(r): Variables Entered/Removed<sup>a</sup>; Model Summary; ANOVA<sup>a</sup>; Coefficients<sup>a</sup>.

Table S4 show the results of unary linear regression on TSV(s): Variables Entered/Removed<sup>a</sup>; Model Summary; ANOVA<sup>a</sup>; Coefficients<sup>a</sup>.

Table S5 show the results of unary linear regression on TCV(r): Variables Entered/Removed<sup>a</sup>; Model Summary; ANOVA<sup>a</sup>; Coefficients<sup>a</sup>.

Table S6 show the results of unary linear regression on TCV(s): Variables Entered/Removed<sup>a</sup>; Model Summary; ANOVA<sup>a</sup>; Coefficients<sup>a</sup>.
